# Supplementary material
Source: PubMed Central journal article supplement (PMC6223628)
Supplement: NIHMS993168-supplement-1.pdf [file NIHMS993168-supplement-1.pdf]

**Molecular Cell, Volume 72**

**Supplemental Information**

**Structures of the Human PGD<sub>2</sub> Receptor CRTH2**

**Reveal Novel Mechanisms for Ligand Recognition**

**Lei Wang, Dandan Yao, R.N.V. Krishna Deepak, Heng Liu, Qingpin Xiao, Hao Fan, Weimin Gong, Zhiyi Wei, and Cheng Zhang**

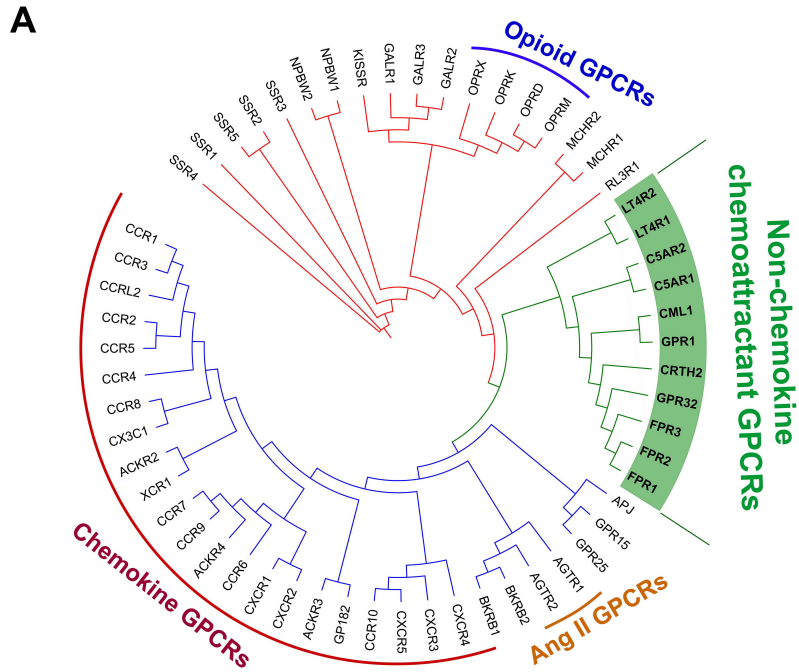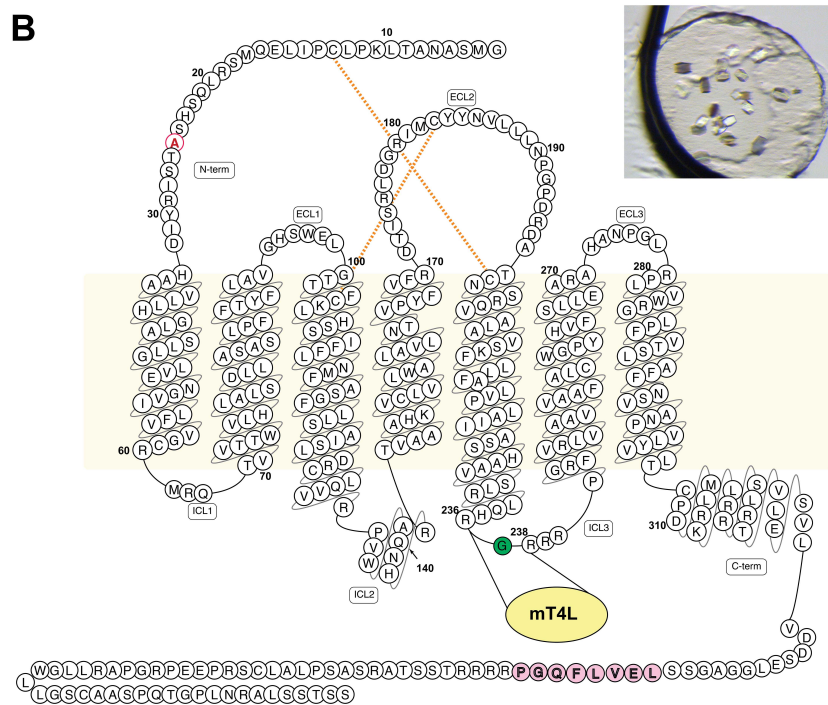

**Figure S1**

**Figure S1. Non-chemokine chemoattractant GPCRs and CRTH2 crystallization. Related to Figure 1 and Table 1. (A)** Phylogenetic tree of the  $\gamma$ -subgroup of the rhodopsin-like GPCRs. This subgroup contains mainly peptide GPCRs, such as chemokine GPCRs (red arc), angiotensin II receptors (Ang II GPCRs, orange arc) and opioid GPCRs (blue arc). The non-chemokine chemoattractant GPCRs (green arc) also belong to  $\gamma$ -subgroup, which include receptors for anaphylatoxins, formyl peptides and eicosanoids. **(B)** Amino acid sequence of the engineered CRTH2 for our structural study. To aid the crystallization, we engineered human CRTH2 by replacing G237 (green) with mT4L. We also introduced a protease 3C site between S339 and R340 (pink) and cut off the C-terminal segment before crystallization. N25A mutation was introduced to remove the glycosylation site. The construct is referred as CRTH2-mT4L. Two disulfide bonds are shown as orange dashed lines. Crystals of CRTH2-mT4L with CAY10471 in lipidic cubic phase are shown in the upper right panel.

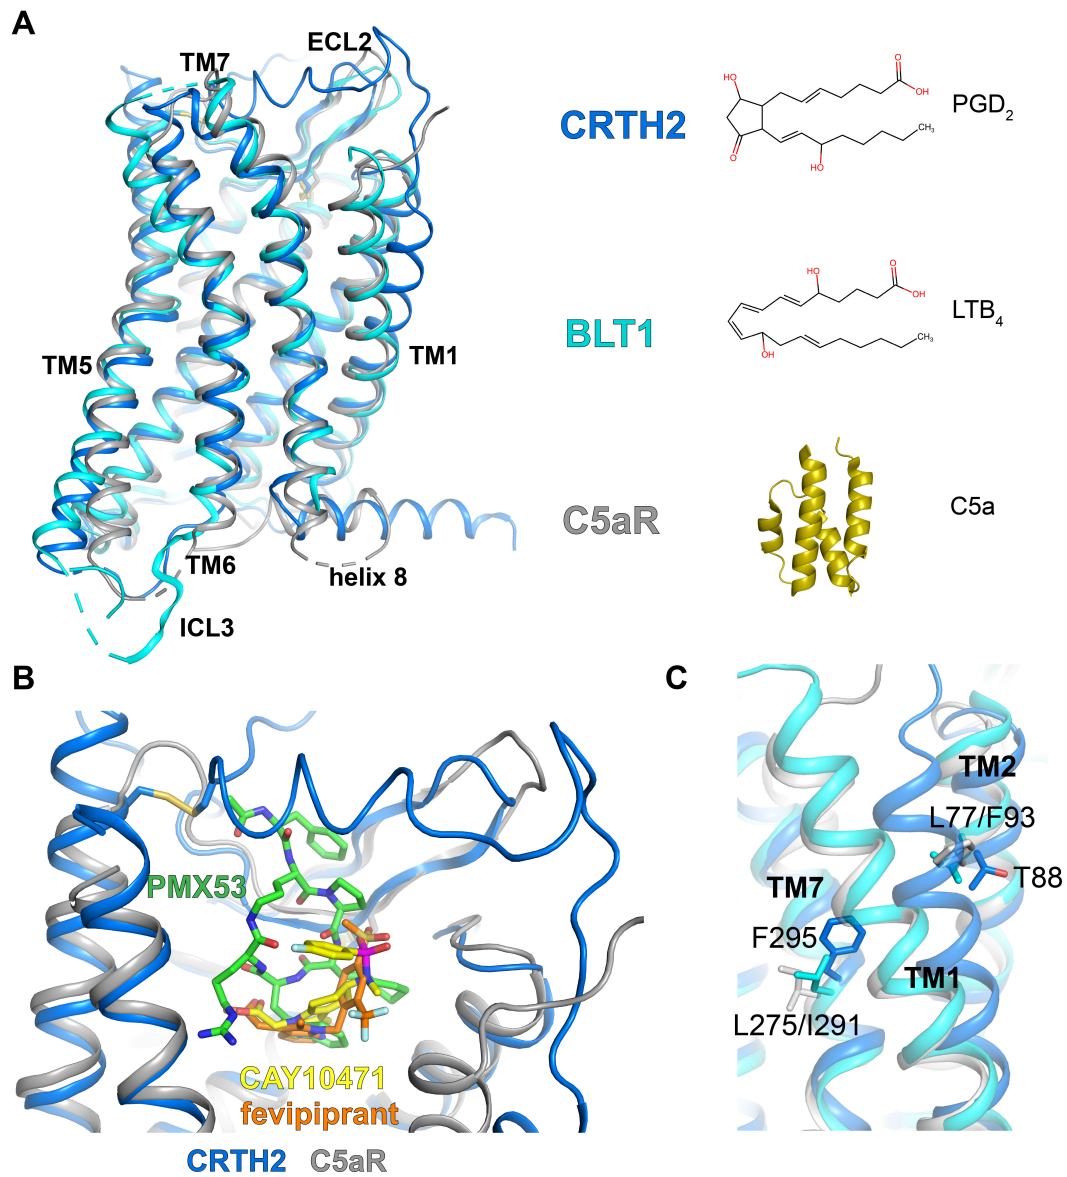

Figure S2

**Figure S2. Structural comparison of CRTH2 to BLT1 and C5aR. Related to Figure 2. (A)** Superimposition of the structures of three non-chemokine chemoattractant receptors, CRTH2 (in blue), C5aR (in grey, PDB ID 5O9H) and BLT1 (in cyan, PDB ID 5X33), and their ligands. The overall structures of these receptors are similar to each other except for the TM1 and the N-terminal region. The endogenous ligands, PGD<sub>2</sub> and LTB<sub>4</sub>, for CRTH2 and BLT1 respectively, are both eicosanoids with similar chemical structures, while the endogenous ligand C5a for C5aR is a 74-amino acid small protein (PDB ID 4P3A). **(B)** Superimposition of ligands in C5aR and CRTH2. The CRTH2 antagonists CAY10471 and fevipipirant overlap with the lower part of the peptide antagonist PMX53 (green) for C5aR. **(C)** Conformation of TM1. The conformation of TM1 in CRTH2 compared to it in BLT1 and C5aR. The color scheme is the same as it in **A**. Two residues in CRTH2, F295<sup>7.44</sup> in TM7 and T88<sup>2.61</sup> in TM2, may partly account for the conformation of TM1. These residues are replaced by L275 and L77 in BLT1 and by I291 and F93 in C5aR, leading to a different conformation of TM1 in those two receptors.

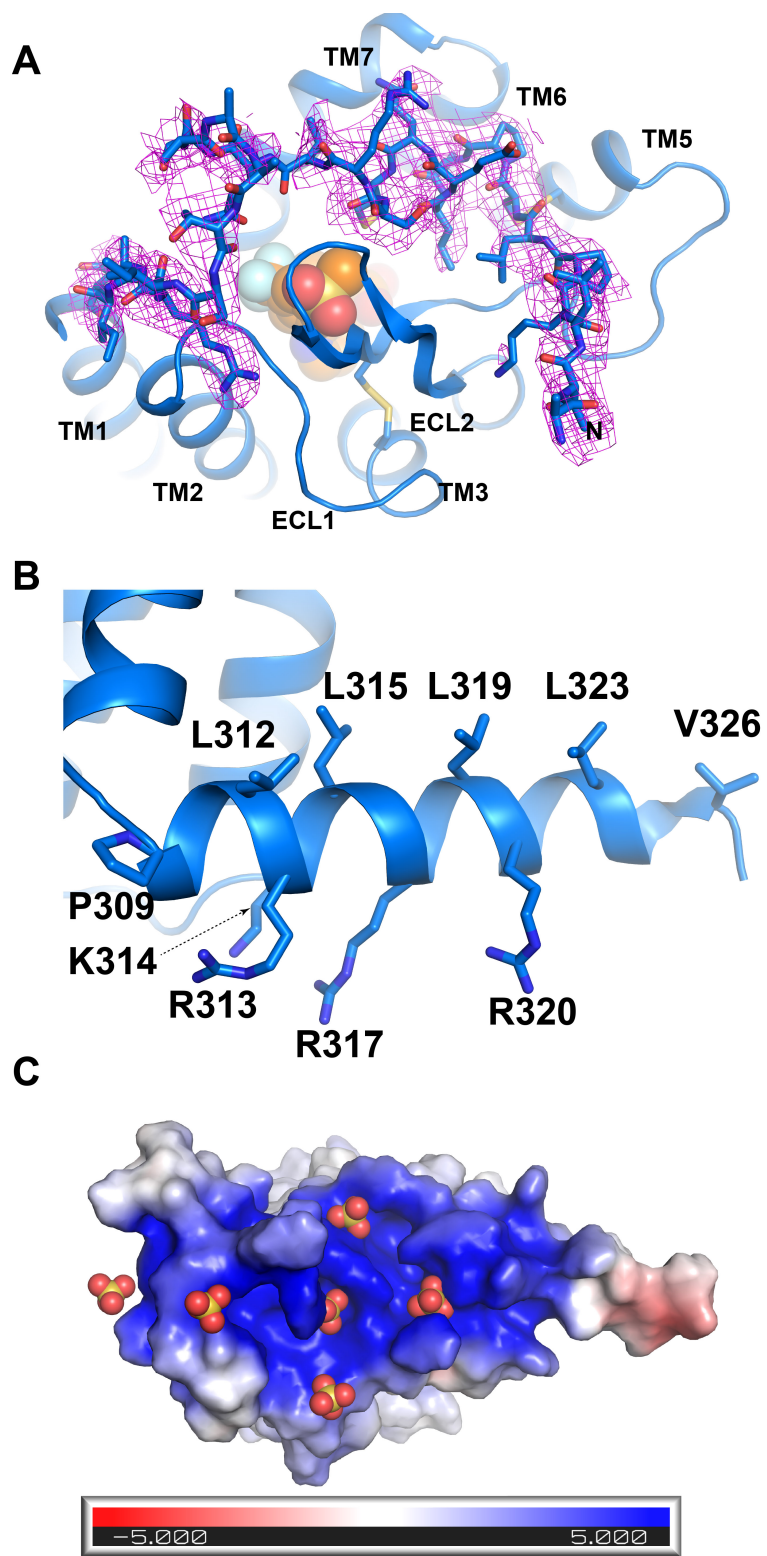

Figure S3

**Figure S3. Extracellular and cytoplasmic regions in CRTH2. Related to Figure 2. (A)**

Composite  $2F_o - F_c$  omit electron-density map for the N-terminal region from A5 to D32 calculated based on the structure of fevipirant-CRTH2 contoured at  $1.0 \sigma$  shown as magenta mesh. Fevipirant is shown as spheres. **(B)** Helix 8 with hydrophobic residues facing the lipid bilayer and positively charged residues extending into the intracellular space. **(C)** Highly positively charged cytoplasmic surface with sulfate ions shown as spheres.

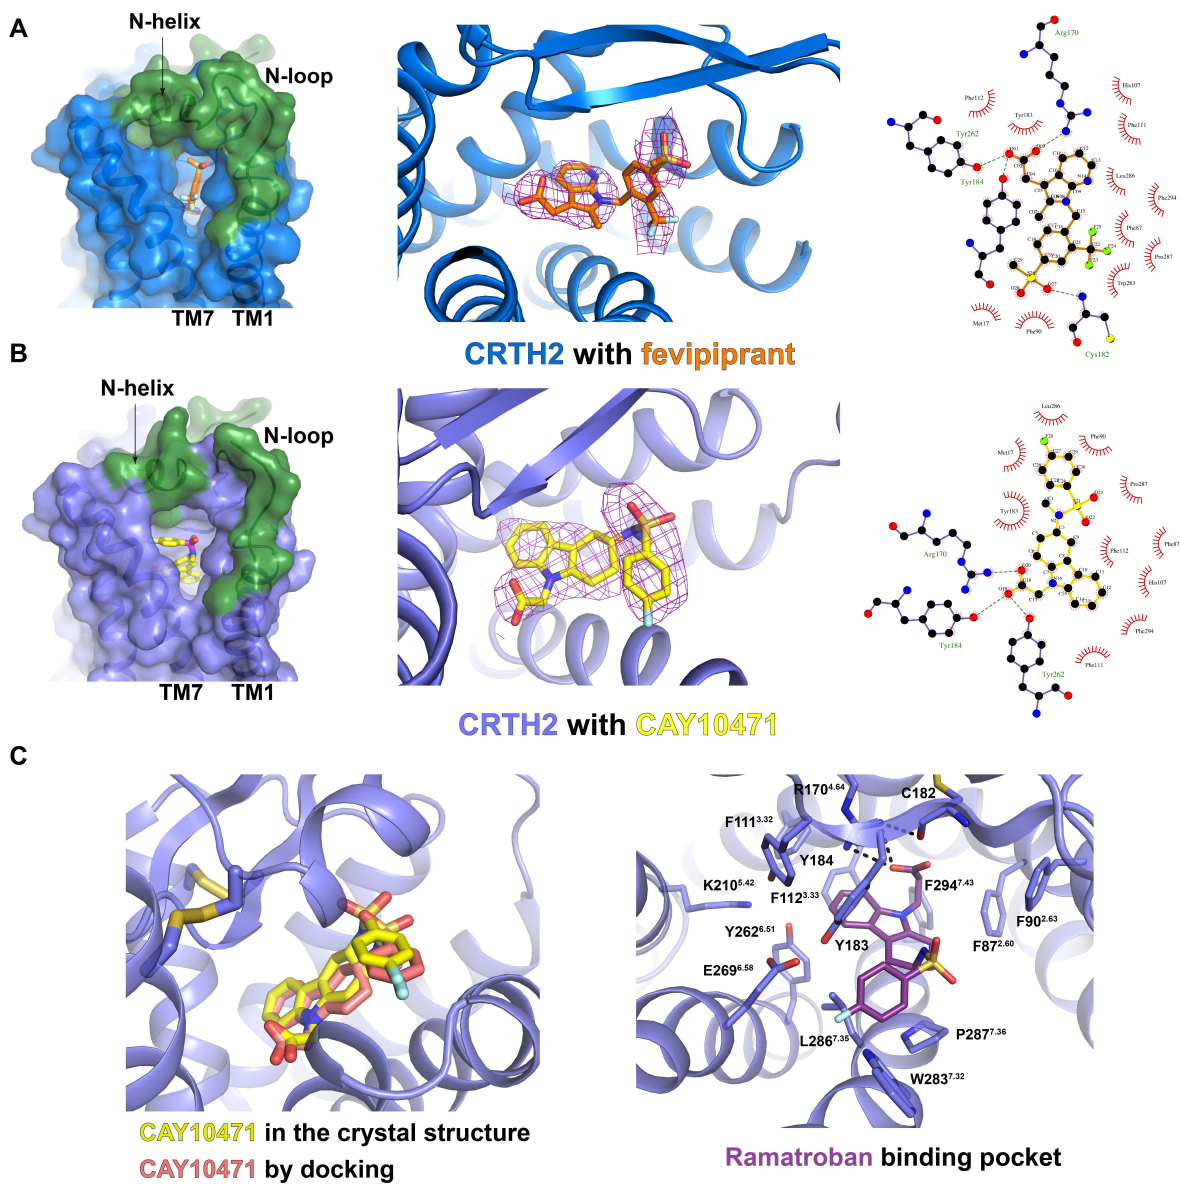

Figure S4



**Figure S4. Binding of CRTH2 antagonists. Related to Figure 3 and Figure 4. (A)**

Fevipirant in orange and CRTH2 in blue. **(B)** CAY10471 in yellow and CRTH2 in slate. In A or B, the *left* panel shows the open end of the ligand binding pocket formed by N-helix, N-loop as well as the extracellular regions of TM1 and TM7; the *middle* panel shows the composite  $2F_o - F_c$  omit electron density map for each ligand as purple mesh contoured at  $1.2 \sigma$ ; the *right* panel shows the 2-D representation of ligand-receptor interactions generated using LigPlot<sup>+</sup> (<https://www.ebi.ac.uk/thornton-srv/software/LigPlus/>). In this panel, the bonds in fevipirant and CAY10471 are colored in orange and yellow, respectively, while the bonds in the CRTH2 residues are colored in blue. The hydrogen bonds are shown as green dashed lines. The residues involved in the hydrophobic interactions are shown as red half-circles. **(C)** Docking of ramatroban. The *left* panel shows that docking CAY10471 back into the structure of CRTH2 with CAY10471 could reproduce the same binding pose, validating our docking methods. The *right* panel shows the details of the binding site for ramatroban by docking. The carboxylate group forms hydrogen-bonds only with R170<sup>4.64</sup>. Most of the residues that form aromatic and hydrophobic interactions with CAY10471 also engage in similar interactions with ramatroban. The central tetracarbazole group sits in an unfavorable polar environment surrounded by E269<sup>7.35</sup> and the Y184-K210<sup>5.42</sup>-Y262<sup>6.51</sup> cluster.

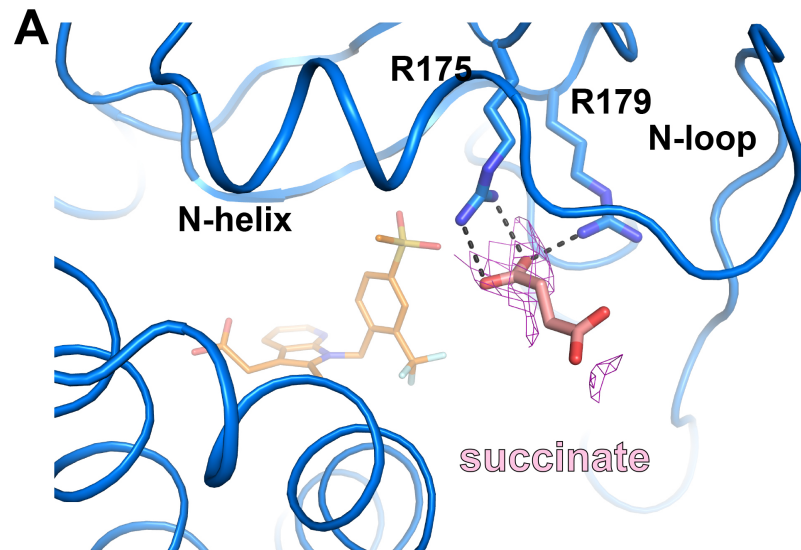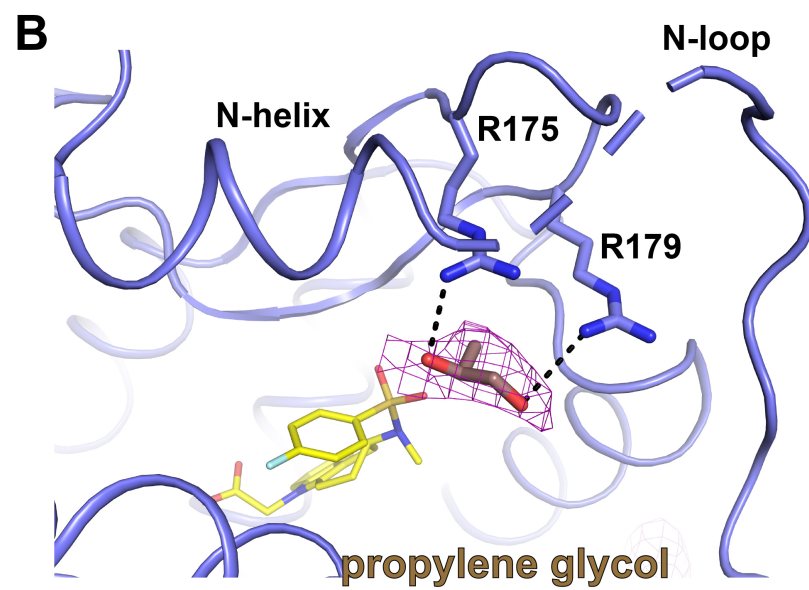

Figure S5

**Figure S5. Molecules modeled at the potential ligand access port. Related to Figure 5.**

**(A)** Succinate molecule modeled in the structure of fevipirant-bound CRTH2 shown as pink sticks. The composite  $2F_o-F_c$  omit electron density map shown as purple mesh is contoured at  $0.8 \sigma$ . **(B)** Propylene glycol molecule modeled in the structure of CAY10471-bound CRTH2 shown as brown sticks. The composite  $2F_o-F_c$  omit electron density map shown as purple mesh is contoured at  $1.2 \sigma$ . Fevipirant and CAY10471 in **A** and **B** are shown as orange and yellow sticks, respectively. The density for succinate is weaker than the density for propylene glycol, presumably due to the low concentration of succinate in the crystallization conditions for the crystals of fevipirant-bound CRTH2, or a higher structural flexibility of succinate compared to propylene glycol.

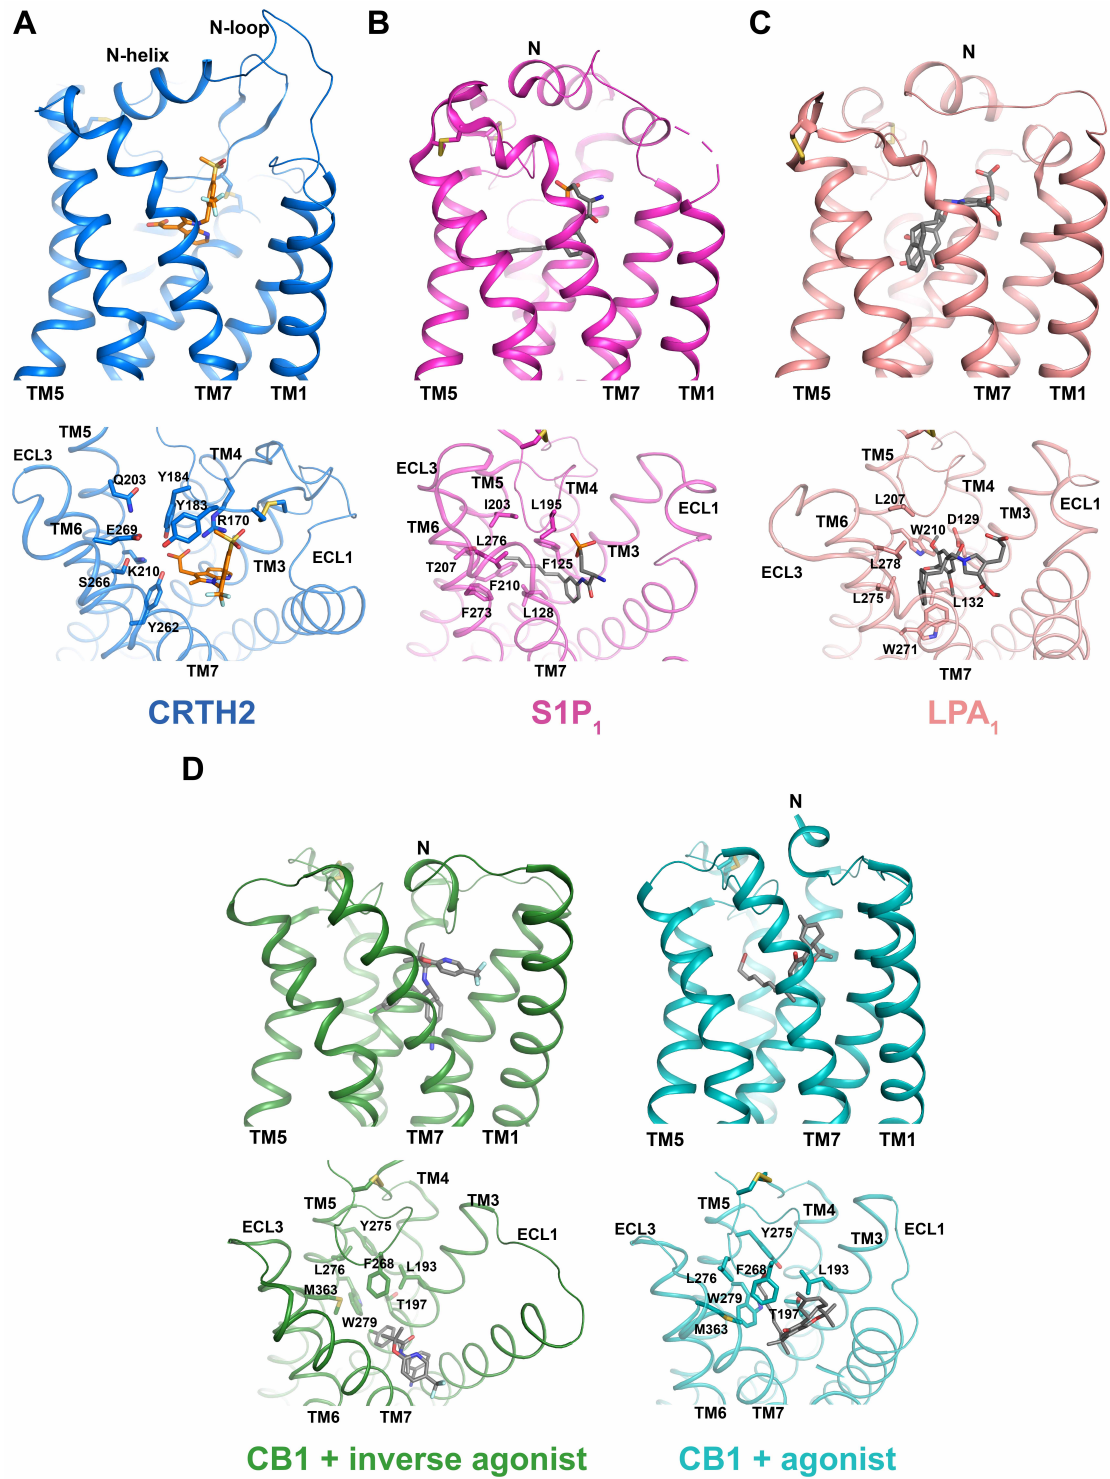

Figure S6

**Figure S6. Comparison of the ligand-binding pockets in four lipid GPCRs. Related to Figure 6. (A)** CRTH2 (blue) with fevipiprant (orange). **(B)** S1P<sub>1</sub> (magenta) with antagonist (grey), PDB ID 3V2W. **(C)** LPA<sub>1</sub> (pink) with antagonist (grey), PDB ID 4Z35. **(D)** *Left:* CB1 (green) with inverse agonist (grey), PDB ID 5U09. *Right:* CB1 (cyan) with agonist (grey), PDB ID 5XRA. In all figures, *upper* panels show the potential ligand access port in CRTH2 formed by N-loop, N-helix and the N-terminal region of TM1, and the corresponding regions in S1P<sub>1</sub>, LPA<sub>1</sub> and CB1. *Lower* panels show the details of the distal end of the ligand-binding pocket. For S1P<sub>1</sub> and LPA<sub>1</sub>, only antagonist-bound structures are available. In each structure, one end of the ligand is located at the occluded distal end of the ligand-binding pocket formed by residues from TM3-7, pointing to TM5. In S1P<sub>1</sub>, LPA<sub>1</sub> and CB1, these areas are largely hydrophobic, while in CRTH2 the corresponding area is with a highly polar environment, indicating a different binding mode of PGD<sub>2</sub> for CRTH2 compared to the lipid ligands for the other lipid GPCRs.

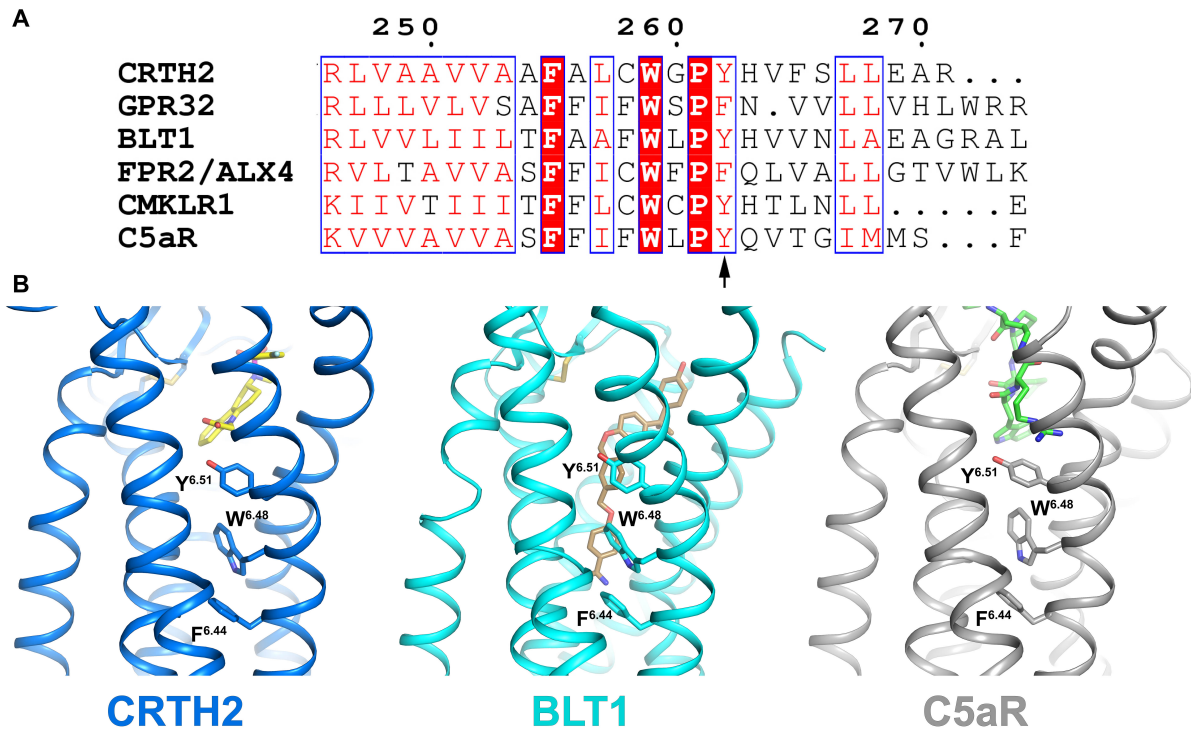

**Figure S7**

**Figure S7. Potentially conserved F<sup>6.44</sup>-W<sup>6.48</sup>-Y/F<sup>6.51</sup> motif in non-chemokine chemoattractant GPCRs. Related to Figure 2. (A)** Sequence alignment of six members of the non-chemokine chemoattractant GPCRs from human. The highly conserved residues F<sup>6.44</sup>, W<sup>6.48</sup> and P<sup>6.50</sup> are shown with a red background. The arrow points to a relatively conserved residue Y/F<sup>6.51</sup>. **(B)** Conserved F<sup>6.44</sup>-W<sup>6.48</sup>-Y<sup>6.51</sup> motif. Three residues, F<sup>6.44</sup>, W<sup>6.48</sup> and Y<sup>6.51</sup>, line on TM6 in the structures of CRTH2, BLT1 (PDB ID 5X33) and C5aR (PDB ID 6C1R). Y<sup>6.51</sup> interacts with the ligand and packs with W<sup>6.48</sup> in each structure. The antagonists of CRTH2, BLT1 and C5aR are shown as yellow, brown and green sticks respectively.
